# Supplementary material for: Recent breakthroughs in through-space charge transfer in π-stacked molecules as thermally activated delayed fluorescent emitters for OLED applications
Source: Royal Society of Chemistry journal article supplement (doi:10.1039/d4tc05181e), 2025-01-01
Supplement: d4tc05181e1.pdf [file d4tc05181e1.pdf]

## Recent Breakthroughs in Through-Space Charge Transfer in $\pi$ -Stacked Molecules as Thermally Activated Delayed Fluorescent Emitters for OLED Applications

Kummara Madhusudana Rao,<sup>a</sup> Rajavaram Ramaraghavulu,<sup>b</sup> Deepti Kolli,<sup>c</sup> S. Harinath Babu,<sup>d</sup> S. V. Prabhakar Vattikuti,<sup>e,\*</sup> and Malleshm Godumala<sup>f,\*</sup>

<sup>a</sup> School of Chemical Engineering, Yeungnam University, 280 Daehak-Ro, Gyeongsan, Gyeongbuk, 38541, South Korea.

<sup>b</sup> Department of Physics, School of Applied Science, REVA University, Bangalore, 560064, Karnataka, India.

<sup>c</sup> Department of Chemistry, Koneru Lakshmaiah Education Foundation, Green fields, Vaddeswaram, Guntur, Andhra Pradesh, 522302 India.

<sup>d</sup> Department of Humanities and Sciences, Annamacharya University, Rajampet, Kadapa (dt), Andhra Pradesh, 516126, India.

<sup>e</sup> School of Mechanical Engineering, College of Engineering, Yeungnam University, 280 Daehak-ro, Gyeongsan, Gyeongbuk, 38541, Republic of Korea.

<sup>f</sup> Department of Chemistry, Anurag University, Ghatkesar, Hyderabad, Telangana, 500088, India.

\*E-mail: [vsvprabu@gmail.com](mailto:vsvprabu@gmail.com), [malleesh.iict@gmail.com](mailto:malleesh.iict@gmail.com)

**Table S1:** Thermal and photophysical data of  $\pi$ -stacked TSCT TADF emitters.

| S.No. | Emitter      | Thermal data                | Photophysical data                                                 |                                                                          |                                                                                      | Ref |
|-------|--------------|-----------------------------|--------------------------------------------------------------------|--------------------------------------------------------------------------|--------------------------------------------------------------------------------------|-----|
|       |              | $T_g/T_d$ (°C) <sup>a</sup> | Radiative decay rate constant ( $k_r$ ) ( $10^6$ s <sup>-1</sup> ) | Nonradiative decay rate constant ( $k_{nr}$ ) ( $10^6$ s <sup>-1</sup> ) | Reverse intersystem crossing rate constant ( $k_{RISC}$ ) ( $10^5$ s <sup>-1</sup> ) |     |
| 1     | B-oCz        | 58/303                      | ---                                                                | ---                                                                      | ---                                                                                  | 1   |
| 2     | B-oTC        | 105/280                     | ---                                                                | ---                                                                      | ---                                                                                  | 1   |
| 3     | oB-2Cz       | 108/334                     | 0.1218                                                             | ---                                                                      | 5.17                                                                                 | 2   |
| 4     | oB-2tCz      | ---/380                     | 0.0564                                                             | ---                                                                      | 17.06                                                                                | 2   |
| 5     | S-CNDF-S-tCz | --/246                      | ---                                                                | ---                                                                      | 0.12 ± 0.05                                                                          | 3   |
| 6     | S-CNDF-D-tCz | --/363                      | ---                                                                | ---                                                                      | 2.27 ± 0.30                                                                          | 3   |
| 7     | T-CNDF-T-tCz | --/390                      | ---                                                                | ---                                                                      | 5.07 ± 0.65                                                                          | 3   |
| 8     | SF12oTz      | --/403                      | 400                                                                | ---                                                                      | 10.5                                                                                 | 4   |
| 9     | SF23oTz      | --/386                      | 120                                                                | ---                                                                      | 3.8                                                                                  | 4   |
| 10    | SF34oTz      | --/370                      | 60                                                                 | ---                                                                      | 1.4                                                                                  | 4   |
| 11    | 4Cz-DPS      | 121/394                     | ---                                                                | ---                                                                      | 0.89                                                                                 | 5   |
| 12    | 2Cz-DPS      | 111/389                     | ---                                                                | ---                                                                      | 1.74                                                                                 | 5   |
| 13    | CzTrz        | 124.6/365.9                 | ---                                                                | ---                                                                      | ---                                                                                  | 6   |
| 14    | mCzTrz       | 124.1/309.4                 | ---                                                                | ---                                                                      | ---                                                                                  | 6   |
| 15    | tCzTrz       | 127.8/372.8                 | ---                                                                | ---                                                                      | ---                                                                                  | 6   |
| 16    | CzPhPI       | --/280                      | ---                                                                | ---                                                                      | ---                                                                                  | 7   |
| 17    | CzPhNI       | --/310                      | ---                                                                | ---                                                                      | ---                                                                                  | 7   |
| 18    | v-PXZTRZ     | 118/453                     | ---                                                                | ---                                                                      | 23                                                                                   | 8   |
| 19    | v-PTZTRZ     | 120/408                     | ---                                                                | ---                                                                      | 20                                                                                   | 8   |
| 20    | l-PXZTRZ     | --/447                      | ---                                                                | ---                                                                      | 6                                                                                    | 8   |
| 21    | l-PTZTRZ     | --/451                      | ---                                                                | ---                                                                      | 8                                                                                    | 8   |
| 22    | DTPA-DTM     | 117/430                     | 19.9                                                               | 31.6                                                                     | 6.5                                                                                  | 9   |
| 23    | DTPA-DDTM    | 170/485                     | 21                                                                 | 13.7                                                                     | 6.7                                                                                  | 9   |
| 24    | tCPT         | 133.2/387.6                 | 79                                                                 | 0.015                                                                    | 0.15                                                                                 | 10  |
| 25    | Ph-tCPT      | 140.9/389.1                 | 63                                                                 | 0.011                                                                    | 0.2                                                                                  | 10  |
| 26    | o-PhCz-tCPT  | 168.3/441.8                 | 51                                                                 | 0.015                                                                    | 0.3                                                                                  | 10  |
| 27    | p-PhCz-tCPT  | NA/443.9                    | 46                                                                 | 0.011                                                                    | 0.22                                                                                 | 10  |

|    |                           |             |       |       |       |    |
|----|---------------------------|-------------|-------|-------|-------|----|
| 28 | 3-PhCz-tCPT               | 162.3/435.9 | 15    | 0.12  | 1.7   | 10 |
| 29 | PXZ-CTZ                   | --/422      | 0.695 | 0.562 | 12.8  | 11 |
| 30 | DPXZ-CTZ                  | --/425      | 0.848 | 0.246 | 23.1  | 11 |
| 31 | DPXZ-BO                   | --/408      | 2.36  | 0.238 | 21.0  | 11 |
| 32 | Ph <sub>3</sub> TRZCzTPA  | 111/324     | 1.5   | ---   | 0.63  | 12 |
| 33 | Ph <sub>2</sub> TRZCzTPA  | 111/389     | 3.7   | ---   | 1.0   | 12 |
| 34 | Ph <sub>2</sub> TRZCzPhCz | 127/340     | ---   | ---   | ---   | 12 |
| 35 | Ph <sub>3</sub> TRZCzPhCz | 129/419     | ---   | ---   | ---   | 12 |
| 36 | 3TCPM                     | --/367      | 8.1   | 1.48  | 10.5  | 13 |
| 37 | 2TCPM                     | 148/377     | 4.3   | 1.74  | 9.4   | 13 |
| 38 | 1TCPM                     | --/407      | 8.9   | 0.87  | 23.4  | 13 |
| 39 | 1TCPM-Cz                  | --/433      | 9.2   | 0.69  | 29.7  | 13 |
| 40 | TC                        | 115/403     | ---   | ---   | ---   | 14 |
| 41 | PTC                       | 115/377     | ---   | ---   | ---   | 14 |
| 42 | PAPTC                     | 103/472     | ---   | ---   | 5.08  | 14 |
| 43 | BPAPTC                    | --/462      | ---   | ---   | 8.43  | 14 |
| 44 | 2CTC                      | NA/468      | ---   | ---   | 1.23  | 15 |
| 45 | 2TBCTC                    | NA/523      | ---   | ---   | 1.54  | 15 |
| 46 | DPXZ-QX                   | ---         | 1.65  | 0.579 | 1.86  | 16 |
| 47 | DPXZ-DFQX                 | ---         | 1.74  | 0.712 | 4.33  | 16 |
| 48 | DPXZ-2QX                  | ---         | 0.89  | 0.133 | 8.21  | 16 |
| 49 | DPXZ-2DFQX                | ---         | 2.67  | 0.264 | 4.64  | 16 |
| 50 | TPA-QX                    | ---         | ---   | ---   | ---   | 16 |
| 51 | PXZ-QX                    | ---         | ---   | ---   | ---   | 16 |
| 52 | TPXZ-QX                   | ---/420     | 3.60  | 5.18  | 1.75  | 17 |
| 53 | TPXZ-2QX                  | ---/472     | 6.87  | 14.6  | 1.53  | 17 |
| 54 | 2DPXZ-QX                  | ---/472     | ---   | ---   | 3.31  | 18 |
| 55 | 2DPXZ-DFQX                | ---/477     | ---   | ---   | 3.51  | 18 |
| 56 | BNB-m                     | ---/529     | 6.12  | ---   | 1.60  | 19 |
| 57 | BNB-p                     | ---/522     | 2.86  | ---   | 0.988 | 19 |
| 58 | NBNN1                     | NA/378      | ---   | ---   | 2.7   | 20 |
| 59 | NBNN2                     | 188/495     | ---   | ---   | 1.2   | 20 |
| 60 | TAcBO-H                   | ---         | ---   | ---   | 27    | 21 |
| 61 | TAcBO-F                   | ---         | ---   | ---   | 52    | 21 |
| 62 | Ac3TRZ3                   | 181/>380    | ---   | ---   | 10    | 22 |
| 63 | TAc3TRZ3                  | 175/>380    | ---   | ---   | 21    | 22 |
| 64 | BD-Cy                     | 150/--      | ---   | ---   | 86    | 23 |
| 65 | YD-TF                     | 161/--      | ---   | ---   | 77    | 23 |
| 66 | RD-2TF                    | 153/--      | ---   | ---   | 19    | 23 |
| 67 | TRZ-o-SDMAC               | --/>435     | ---   | ---   | ---   | 24 |
| 68 | TRZ-m-SDMAC               | --/>435     | ---   | ---   | ---   | 24 |
| 69 | TRZ-p-SDMAC               | --/>435     | ---   | ---   | ---   | 24 |
| 70 | XPT                       | 101/318     | ---   | ---   | ---   | 25 |
| 71 | XCT                       | 109/312     | ---   | ---   | ---   | 25 |
| 72 | XtBuCT                    | 132/313     | ---   | ---   | ---   | 25 |
| 73 | DMAC-TPA-TRZ              | 141/372     | ---   | ---   | ---   | 26 |
| 74 | DMAC-Ph-TRZ               | ---/315     | ---   | ---   | ---   | 26 |
| 75 | PXZ-TPA-TRZ               | 122/361     | ---   | ---   | 0.764 | 26 |
| 76 | PXZ-Ph-TRZ                | ---/303     | ---   | ---   | 1.48  | 26 |
| 77 | TPA-ace                   | ---         | ---   | ---   | ---   | 27 |
| 78 | TPA-ace-Br                | ---         | ---   | ---   | ---   | 27 |
| 79 | 2TPA-ace                  | ---         | ---   | ---   | ---   | 27 |
| 80 | TPA-ace-CN                | ---         | ---   | ---   | ---   | 27 |
| 81 | TPA-ace-TRZ               | ---         | ---   | ---   | ---   | 27 |
| 82 | BF-oTCz                   | 227/---     | ---   | ---   | 0.6   | 28 |
| 83 | BF-oPCz                   | 290/---     | ---   | ---   | 0.5   | 28 |
| 84 | BF-oTMCz                  | 335/---     | ---   | ---   | 22.7  | 28 |

<sup>a</sup> T<sub>g</sub>: Glass transition temperature and T<sub>d</sub>: decomposition temperature.

## References

- 1 X.-L. Chen, J.-H. Jia, R. Yu, J.-Z. Liao, M.-X. Yang and C.-Z. Lu, Combining charge-transfer pathways to achieve unique thermally activated delayed fluorescence emitters for high-performance solution-processed, non-doped blue OLEDs, *Angew. Chem., Int. Ed.*, 2017, **56**, 15006–15009.
- 2 M. Ouyang, L. Xing, Q. Chen, H. Huang, M. Zhu, K. Hu, Y. Liu, W.-C. Chen, Y. Huo and C. Yang, Highly Efficient Thermally Activated Delayed Fluorescence Emitters Enabled by Double Charge Transfer Pathways via Ortho-Linked Triarylboron/ Carbazole Hybrids, *J. Mater. Chem. C*, 2021, **9**, 1678–1684.
- 3 X. Zheng, R. Huang, C. Zhong, G. Xie, W. Ning, M. Huang, F. Ni, F. B. Dias and C. Yang, Achieving 21% External Quantum Efficiency for Nondoped Solution-Processed Sky-Blue Thermally Activated Delayed Fluorescence OLEDs by Means of Multi-(Donor/Acceptor) Emitter with Through-Space/-Bond Charge Transfer, *Adv. Sci.*, 2020, **7**, 1902087.
- 4 X. Xia, Y. Wang, N. Li, X. Cao, G. Xie, H. Hong, C. Zhong, L. Wang and C. Yang, Regulating the photophysical properties of highly twisted TADF emitters by concurrent through-space/-bond charge transfer, *Chem. Eng. J.*, 2020, **402**, 126173.
- 5 Z. Yang, Z. Mao, C. Xu, X. Chen, J. Zhao, Z. Yang, Y. Zhang, W. Wu, S. Jiao, Y. Liu, M. P. Aldred and Z. Chi, A sterically hindered asymmetric D–A–D' thermally activated delayed fluorescence emitter for highly efficient non-doped organic light-emitting diodes, *Chem. Sci.*, 2019, **10**, 8129.
- 6 J.-R. Cha, C. W. Lee, J. Y. Lee and M.-S. Gong, Design of ortho-linkage carbazole-triazine structure for high-efficiency blue thermally activated delayed fluorescent emitters, *Dyes Pigm.*, 2016, **134**, 562–568.
- 7 Y. Danyliwa, D. Volyniuk, O. Bezikonny, I. Hladka, K. Ivaniuk, I. Helzhynskyy, P. Stakhira, A. Tomkeviciene, L. Skhirtladze and J. V. Grazulevicius, Through-space charge transfer in luminophore based on phenyl-linked carbazole- and phthalimide moieties utilized in cyan-emitting OLEDs, *Dyes Pigm.*, 2020, **172**, 107833.
- 8 M. Yu, X. Zhu, J. Zeng, H. Liu, R. Huang, Z. Zhuang, P. Shen, Z. Zhao and B. Z. Tang, Comparative study on the impact of through-space charge transfer over the electroluminescence performance of delayed fluorescence molecules, *J. Mater. Chem. C*, 2021, **9**, 14808–14814.
- 9 F. Ma, Y. Cheng, Y. Zheng, H. Ji, K. Hasrat and Z. Qi, Rational design of thermally activated delayed fluorescence emitters with aggregation-induced emission employing combined charge transfer pathways for fabricating efficient non-doped OLEDs, *J. Mater. Chem. C*, 2019, **7**, 9413–9422.
- 10 X. Li, J. Li, D. Liu, D. Li and R. Dong, A donor design strategy for triazine-carbazole blue thermally activated delayed fluorescence materials, *New J. Chem.*, 2020, **44**, 9743–9753.
- 11 C. Wu, W. Liu, K. Li, G. Cheng, J. Xiong, T. Teng, C.-M. Che and C. Yang, Face-to-Face Orientation of Quasiplanar Donor and Acceptor Enables Highly Efficient Intramolecular Exciplex Fluorescence, *Angew. Chem., Int. Ed.*, 2021, **60**, 3994–3998.
- 12 H. Miranda-Salinas, Y.-T. Hung, Y.-S. Chen, D. Luo, H.-C. Kao, C.-H. Chang, K.-T. Wong and A. Monkman, Controlling through-space and through-bond intramolecular charge transfer in bridged D–D'–A TADF emitters, *J. Mater. Chem. C*, 2021, **9**, 8819–8833.
- 13 F. Ma, H. Ji, D. Zhang, K. Xue, P. Zhang, Z. Qi and H. Zhu, Adjusting the photophysical properties of AIE-active TADF emitters from through-bond to through-space charge transfer for high-performance solution-processed OLEDs, *Dyes Pigm.*, 2021, **188**, 109208.
- 14 K. Li, Y. Zhu, B. Yao, Y. Chen, H. Deng, Q. Zhang, H. Zhan, Z. Xie and Y. Cheng, Rotation-Restricted Thermally Activated Delayed Fluorescence Compounds for Efficient Solution-Processed OLEDs with EQE of up to 24.3% and Small Roll-off, *Chem. Commun.*, 2020, **56**, 5957–5960.
- 15 Z. Yang, N. Qiu, X. Dong, J. Li, P. Zou, D. Yang, D. Ma, B. Z. Tang, and Z. Zhao, Efficient blue thermally activated delayed fluorescence molecules with sandwich-structured through-space charge transfer for fabricating high-performance OLEDs, *Adv. Optical Mater.*, 2024, **12**, 2302677.
- 16 C. Jiang, J. Miao, D. Zhang, Z. Wen, C. Yang, and K. Li, Acceptor-donor-acceptor  $\pi$ -stacking boosts intramolecular through-space charge transfer towards efficient red TADF and high-performance OLEDs, *Research*, 2022, **2022**, 9892802.
- 17 X.-F. Song, C. Jiang, N. Li, J. Miao, K. Li, and C. Yang, Simultaneously enhancing the planarity and electron-donating capability of donors for through-space charge transfer TADF towards deep red emission, *Chem. Sci.*, 2023, **14**, 12246–12254.
- 18 P. Chen, C. Jiang, N. Li, X. F. Song, X. Wan, H. Liu, J. G. Yang, K. Li, Sandwich-type thermally activated delayed fluorescence molecules with through-space charge transfer excited state for red OLEDs, *Org. Electron.*, 2024, **133**, 107114.
- 19 J. Wang, J. Miao, C. Jiang, S. Luo, C. Yang, K. Li, Engineering Intramolecular  $\pi$ -Stacking Interactions of Through-Space Charge-Transfer TADF Emitters for Highly Efficient OLEDs with Improved Color Purity, *Adv. Opt. Mater.*, 2022, **10**, 2201071.
- 20 S. Luo, J. Wang, N. Li, X. F. Song, X. Wan, K. Li, C. Yang, Regulation of Multiple Resonance Delayed Fluorescence via Through-Space Charge Transfer Excited State towards High-Efficiency and Stable Narrowband Electroluminescence, *Angew. Chem. Int. Ed.*, 2023, **62**, e202310943.
- 21 B. Du, X. Wang, F. Chen, Q. Yang, S. Shao, L. Wang, X. Jing and F. Wang, Through-space charge transfer dendrimers employing oxygen-bridged triarylboron acceptors for efficient deep-blue electroluminescence, *Chem. Commun.*, 2021, **57**, 7144–7147.
- 22 X. Wang, S. Wang, J. Lv, S. Shao, L. Wang, X. Jing and F. Wang, Through-space charge transfer hexaarylbenzene dendrimers with thermally activated delayed fluorescence and aggregation-induced emission for efficient solution-processed OLEDs, *Chem. Sci.*, 2019, **10**, 2915–2923.
- 23 X. Wang, J. Hu, J. Lv, Q. Yang, H. Tian, S. Shao, L. Wang, X. Jing and F. Wang,  $\pi$ -Stacked Donor–Acceptor Dendrimers for Highly Efficient White Electroluminescence, *Angew. Chem., Int. Ed.*, 2021, **60**, 16585–16593.

- 24 J. Li, L. Zhou, J. He, Q. Xue, L. Xu, G. Xie, Propeller-shape isomers with turn-on through-space charge transfer for solution-processed non-doped organic light-emitting diodes, *Chem. Eng. J.* 2023, **452**, 139120.
- 25 H. Tsujimoto, D.-G. Ha, G. Markopoulos, H. S. Chae, M. A. Baldo, T. M. Swager, Thermally Activated Delayed Fluorescence and Aggregation Induced Emission with Through-Space Charge Transfer, *J. Am. Chem. Soc.*, 2017, **139**, 4894–4900.
- 26 K.-L. Woon, C.-L. Yi, K.-C. Pan, M. K. Etherington, C.-C. Wu, K.-T. Wong and A. P. Monkman, Intramolecular Dimerization Quenching of Delayed Emission in Asymmetric D–D'–A TADF Emitters, *J. Phys. Chem. C*, 2019, **123**, 12400–12410.
- 27 S. Kumar, L. G. Franca, K. Stavrou, E. Crovini, D. B. Cordes, A. M. Z. Slawin, A. P. Monkman and E. Zysman-Colman, Investigation of Intramolecular Through-Space Charge-Transfer States in Donor–Acceptor Charge-Transfer Systems, *J. Phys. Chem. Lett.*, 2021, **12**, 2820–2830.
- 28 D. Zhang, S. Jiang, X. Tao, F. Lin, L. Meng, X.-L. Chen, C.-Z. Lu, Efficient Spin-Flip between Charge-Transfer States for High-Performance Electroluminescence, without an Intermediate Locally Excited State, *Research*, 2023, **6**, Article 0155.
